# Supplementary material
Source: PubMed Central journal article supplement (PMC6400312)
Supplement: NIHMS1517248-supplement-1.pdf [file NIHMS1517248-supplement-1.pdf]

## Supplementary Tables

Supplemental Table 1. Urine biomarker assay information

| Assays      | Study         | Observed Range                 | Observed Average | Inter-Assay CV% Average |
|-------------|---------------|--------------------------------|------------------|-------------------------|
| Albumin     | WIHS          | 315 - $\geq$ 60,240 ng/mL      | 14,422 ng/mL     | 10.19%                  |
|             | MACS          | 310 - $\geq$ 60,240 ng/mL      | 15,113 ng/mL     | 7.15%                   |
| $\beta$ 2M  | WIHS          | 0.67 - 20,249 ng/mL            | 1,070 ng/mL      | 9.09%                   |
|             | MACS          | 2.21 - 33,797 ng/mL            | 1,337 ng/mL      | 8.77%                   |
| Cystatin C  | WIHS          | 4.29 - 21,210 ng/mL            | 132.91 ng/mL     | 7.60%                   |
|             | MACS          | 2.56 - 1,927 ng/mL             | 58.60 ng/mL      | 3.74%                   |
| EGF         | WIHS          | 0.51 - 62.57 ng/mL             | 15.75 ng/mL      | 5.98%                   |
|             | MACS          | 0.45 - 65.08 ng/mL             | 11.48 ng/mL      | 2.74%                   |
| NGAL        | WIHS          | 1.90 - 6,072.84 ng/mL          | 89.51 ng/mL      | 4.37%                   |
|             | MACS          | 0.85 - 294 ng/mL               | 20.96 ng/mL      | 4.05%                   |
| OPN         | WIHS          | 16.88 - 7,130.57 ng/mL         | 1,191.66 ng/mL   | 10.46%                  |
|             | MACS          | 24.41 - 7016 ng/mL             | 995 ng/mL        | 5.94%                   |
| UMOD        | WIHS          | 646.15 - 27,876 ng/mL          | 4,109 ng/mL      | 2.69%                   |
|             | MACS          | 561 - 64,524 ng/mL             | 7870 ng/mL       | 2.81%                   |
| Clusterin   | WIHS          | Undetectable - 1,937,752 pg/mL | 225,950 pg/mL    | 8.98%                   |
|             | MACS          | 200.00 - 2,086,290 pg/mL       | 139,900 pg/mL    |                         |
| TFF3        | WIHS          | Undetectable - 18,458 pg/mL    | 532.00 pg/mL     | 10.45%                  |
|             | MACS          | Undetectable - 8,373 pg/mL     | 462.00 pg/mL     |                         |
| IL-18       | WIHS          | 2.90 - 1091 pg/mL              | 105 pg/mL        | 6.19%                   |
|             | MACs          | 1.64 - 702 pg/mL               | 63 pg/mL         |                         |
| KIM-1       | WIHS          | 7.97 - 8216 pg/mL              | 1236 pg/mL       | 11.68%                  |
|             | MACs          | 0.852 - 9897 pg/mL             | 988 pg/mL        |                         |
| MCP-1       | WIHS          | 2.84 - 2935 pg/mL              | 430 pg/mL        | 6.53%                   |
|             | MACs          | 0.309 - 3033 pg/mL             | 286 pg/mL        |                         |
| YKL-40      | WIHS          | 11.5 - 381,911 pg/mL           | 3938 pg/mL       | 4.95%                   |
|             | MACs          | 7.63 - 4917 pg/mL              | 791 pg/mL        |                         |
| $\alpha$ 1m | WIHS and MACS | 5-80 mg/L                      | n/a              | 4.38%, 9.15%, 9.96%     |
| Creatinine  | WIHS and MACS | 1.1 - 610 mg/dL                | n/a              | 2.25%, 2.29%            |

Full names for each biomarker are as follows: trefoil factor 3 (TFF3),  $\alpha$ 1-microglobulin ( $\alpha$ 1m), clusterin, uromodulin (UMOD), kidney injury molecule-1 (KIM-1),  $\beta$ 2-microglobulin ( $\beta$ 2M), albumin-creatinine ratio (ACR), neutrophil gelatinase-associated lipocalin (NGAL), anti-chitinase-3-like protein 1 (YKL-40), monocyte chemoattractant protein-1 (MCP-1), cystatin C (CysC), osteopontin (OPN), epidermal growth factor (EGF), and interleukin-18 (IL-18).

**Supplementary Table 2.** Estimated changes in urine biomarker concentrations after TDF initiation

| Urine Biomarker | Year 0-1                              |          | Year 1+                               |         |
|-----------------|---------------------------------------|----------|---------------------------------------|---------|
|                 | Overall<br>Estimated % change (95%CI) | P-value  | Overall<br>Estimated % change (95%CI) | P-value |
| TFF3            | 77.6 (37.6, 129.1)                    | < 0.0001 | -0.5 (-21.8, 26.5)                    | 0.97    |
| α1m             | 32.3 (12.9, 55.1)                     | 0.0006   | 2.9 (-6.6, 13.3)                      | 0.57    |
| Clusterin       | 20.8 (5.6, 38.1)                      | 0.0063   | 3.2 (-7.9, 15.6)                      | 0.59    |
| UMOD            | 18.9 (4.2, 35.7)                      | 0.010    | -9.7 (-19.6, 1.4)                     | 0.08    |
| KIM-1           | 12.9 (1.2, 26.0)                      | 0.030    | 5.5 (-5.7, 18.1)                      | 0.34    |
| β2M             | 10.3 (-12.0, 38.3)                    | 0.39     | 12.1 (-9.9, 39.6)                     | 0.30    |
| ACR             | 9.3 (-5.6, 26.6)                      | 0.23     | 9.2 (-5.7, 26.6)                      | 0.24    |
| NGAL            | 8.2 (-6.3, 24.9)                      | 0.28     | 3.7 (-10.5, 20.2)                     | 0.63    |
| YKL-40          | 4.8 (-10.3, 22.4)                     | 0.55     | 6.7 (-8.1, 23.8)                      | 0.39    |
| MCP-1           | 2.3 (-7.7, 13.4)                      | 0.67     | 3.5 (-5.4, 13.3)                      | 0.45    |
| CysC            | 0.8 (-6.5, 8.6)                       | 0.83     | 5.6 (-1.4, 13.0)                      | 0.12    |
| OPN             | -0.6 (-8.1, 7.6)                      | 0.88     | 0.6 (-6.8, 8.6)                       | 0.88    |
| EGF             | -4.1 (-9.4, 1.5)                      | 0.15     | 1.1 (-5.1, 7.8)                       | 0.73    |
| IL-18           | -15.3 (-23.1, -6.8)                   | 0.0008   | -4.6 (-13.4, 5.1)                     | 0.33    |
| eGFR            | -10.1 (-12.8, -7.4)                   | <0.001   | -1.3 (-3.0, 0.5)                      | 0.15    |

Estimates are adjusted for urine creatinine. Full names for each biomarker are as follows: trefoil factor 3 (TFF3), α1-microglobulin (α1m), clusterin, uromodulin (UMOD), kidney injury molecule-1 (KIM-1), β2-microglobulin (β2M), albumin-creatinine ratio (ACR), neutrophil gelatinase-associated lipocalin (NGAL), anti-chitinase-3-like protein 1 (YKL-40), monocyte chemoattractant protein-1 (MCP-1), cystatin C (CysC), osteoponin (OPN), epidermal growth factor (EGF), and interleukin-18 (IL-18). eGFR = estimated glomerular filtration rate.

**Supplementary Table 3.** One-year changes in urine biomarker concentrations after TDF initiation, stratified by baseline HIV RNA detectable status

| Urine Biomarker | Baseline HIV RNA<br>Estimated % change (95%CI) |                      | P-value<br>for interaction |
|-----------------|------------------------------------------------|----------------------|----------------------------|
|                 | Undetectable (n=56)                            | Detectable (n=138)   |                            |
| TFF3            | 86.3 (25.0, 177.6)                             | 58.6 (14.4, 120.0)   | 0.54                       |
| α1m             | 80.0 (32.9, 143.8)                             | 22.1 (0.85, 47.7)    | <b>0.03</b>                |
| Clusterin       | 16.8 (-11.2, 53.7)                             | 21.8 (5.6, 40.5)     | 0.79                       |
| UMOD            | 5.6 (-16.8, 34.1)                              | 13.1 (-1.15, 29.4)   | 0.63                       |
| KIM-1           | 42.9 (20.5, 69.5)                              | 10.4 (-1.09, 23.3)   | <b>0.01</b>                |
| β2M             | 83.1 (22.0, 174.7)                             | -10.0 (-33.1, 21.1)  | <b>0.006</b>               |
| ACR             | 13.8 (-7.4, 39.9)                              | -5.8 (-16.8, 6.7)    | 0.13                       |
| NGAL            | 5.6 (-15.9, 32.7)                              | 7.7 (-8.4, 26.6)     | 0.89                       |
| YKL-40          | 33.0 (2.1, 73.4)                               | -4.8 (-20.7, 14.4)   | <b>0.04</b>                |
| MCP-1           | 9.0 (-5.1, 25.3)                               | -1.28 (-12.2, 11.0)  | 0.29                       |
| CysC            | 4.1 (-7.0, 16.7)                               | 0.36 (-9.0, 10.7)    | 0.63                       |
| OPN             | -4.9 (-17.4, 9.4)                              | -1.51 (-10.2, 8.0)   | 0.68                       |
| EGF             | -6.3 (-13.0, 0.88)                             | -1.56 (-6.0, 3.1)    | 0.27                       |
| IL-18           | 19.8 (3.1, 39.2)                               | -26.8 (-33.5, -19.5) | <b>&lt;0.001</b>           |
| eGFR            | -9.5 (-15.4, 3.4)                              | -12 (-20, 4)         | 0.38                       |

Estimates are adjusted for urine creatinine. Full names for each biomarker are as follows: trefoil factor 3 (TFF3), α1-microglobulin (α1m), clusterin, uromodulin (UMOD), kidney injury molecule-1 (KIM-1), β2-microglobulin (β2M), albumin-creatinine ratio (ACR), neutrophil gelatinase-associated lipocalin (NGAL), anti-chitinase-3-like protein 1 (YKL-40), monocyte chemoattractant protein-1 (MCP-1), cystatin C (CysC), osteoponin (OPN), epidermal growth factor (EGF), and interleukin-18 (IL-18).

**Supplementary Table 4.** Estimated urine biomarker concentrations at baseline and one-year after TDF initiation, stratified by baseline HIV RNA detectable status

| Biomarker           | Time on TDF (years) | Baseline HIV RNA              |                              | P-value          |
|---------------------|---------------------|-------------------------------|------------------------------|------------------|
|                     |                     | Undetectable (95% CI)<br>n=56 | Detectable (95% CI)<br>n=138 |                  |
| TFF3 (pg/mL)        | 0                   | 68.0 (46.4, 99.6)             | 88.8 (68.4, 115.2)           | 0.26             |
|                     | 1                   | 126.7 (81.8, 196.1)           | 140.8 (102.9, 192.7)         | 0.70             |
| $\alpha$ 1m (mg/dL) | 0                   | 1.03 (0.85, 1.24)             | 1.08 (0.96, 1.22)            | 0.65             |
|                     | 1                   | 1.85 (1.48, 2.3)              | 1.32 (1.14, 1.53)            | <b>0.01</b>      |
| Clusterin (ng/mL)   | 0                   | 69.6 (55.2, 87.9)             | 56.7 (49.9, 64.4)            | 0.13             |
|                     | 1                   | 81.3 (62.6, 105.6)            | 69.1 (59.8, 79.8)            | 0.29             |
| UMOD (mg/L)         | 0                   | 3.6 (2.9, 4.5)                | 3.7 (3.3, 4.2)               | 0.86             |
|                     | 1                   | 3.8 (3.0, 4.9)                | 4.2 (3.6, 4.8)               | 0.53             |
| KIM-1 (pg/mL)       | 0                   | 554.6 (451.3, 681.7)          | 601.5 (524.3, 690.1)         | 0.52             |
|                     | 1                   | 792.6 (632.2, 993.6)          | 664.3 (574.0, 768.7)         | 0.20             |
| $\beta$ 2M (ng/mL)  | 0                   | 145.1 (105.9, 198.7)          | 289.7 (232.7, 360.6)         | <b>&lt;0.001</b> |
|                     | 1                   | 265.6 (162.0, 435.5)          | 260.8 (190.7, 356.6)         | 0.95             |
| ACR (mg/g)          | 0                   | 3.6 (2.9, 4.5)                | 4.7 (3.9, 5.7)               | 0.07             |
|                     | 1                   | 4.1 (3.1, 5.4)                | 4.5 (3.7, 5.4)               | 0.62             |
| NGAL (ng/mL)        | 0                   | 15.6 (12.5, 19.6)             | 19.7 (16.6, 23.4)            | 0.11             |
|                     | 1                   | 16.5 (13.3, 20.5)             | 21.2 (17.6, 25.6)            | 0.08             |
| YKL-40 (pg/mL)      | 0                   | 445.5 (346.4, 572.8)          | 606.5 (512.0, 718.5)         | <b>0.047</b>     |
|                     | 1                   | 592.6 (469.6, 747.8)          | 577.7 (475.2, 702.3)         | 0.87             |
| MCP-1 (pg/mL)       | 0                   | 201.9 (174.1, 234.2)          | 216.8 (194.3, 241.9)         | 0.45             |
|                     | 1                   | 220.1 (186.2, 260.3)          | 214.0 (190.5, 240.5)         | 0.79             |
| Cystatin C (ng/mL)  | 0                   | 35.7 (31.8, 39.9)             | 38.2 (35.7, 41.0)            | 0.30             |
|                     | 1                   | 37.1 (32.8, 42.1)             | 38.4 (35.1, 42.0)            | 0.67             |
| OPN (ug/dL)         | 0                   | 82.2 (73.0, 92.5)             | 73.0 (66.6, 80.0)            | 0.12             |
|                     | 1                   | 78.1 (68.3, 89.4)             | 71.9 (65.2, 79.2)            | 0.32             |
| EGF (ng/mL)         | 0                   | 10.5 (9.2, 11.9)              | 9.4 (8.7, 10.2)              | 0.19             |
|                     | 1                   | 9.8 (8.4, 11.4)               | 9.3 (8.5, 10.1)              | 0.56             |
| IL-18 (pg/mL)       | 0                   | 41.4 (35.6, 48.3)             | 72.3 (64.8, 80.6)            | <b>&lt;0.001</b> |
|                     | 1                   | 49.7 (43.1, 57.2)             | 52.9 (47.5, 58.9)            | 0.49             |

Marginal mean concentrations were calculated from separate linear mixed models, controlling for baseline viral load status (HIV RNA detectable vs. undetectable), time on TDF (using linear spline with cutpoint at year 1), interaction by baseline viral load, and urine creatinine. Full names for each biomarker are as follows: trefoil factor 3 (TFF3),  $\alpha$ 1-microglobulin ( $\alpha$ 1m), clusterin, uromodulin (UMOD), kidney injury molecule-1 (KIM-1),  $\beta$ 2-microglobulin ( $\beta$ 2M), albumin-creatinine ratio (ACR), neutrophil gelatinase-associated lipocalin (NGAL), anti-chitinase-3-like protein 1 (YKL-40), monocyte chemoattractant protein-1 (MCP-1), cystatin C (CysC), osteoponin (OPN), epidermal growth factor (EGF), and interleukin-18 (IL-18).

## Supplementary Figures

**Supplementary Figure 1.** Heatmap of Spearman correlations of first-year urinary biomarker changes, adjusted for urine creatinine

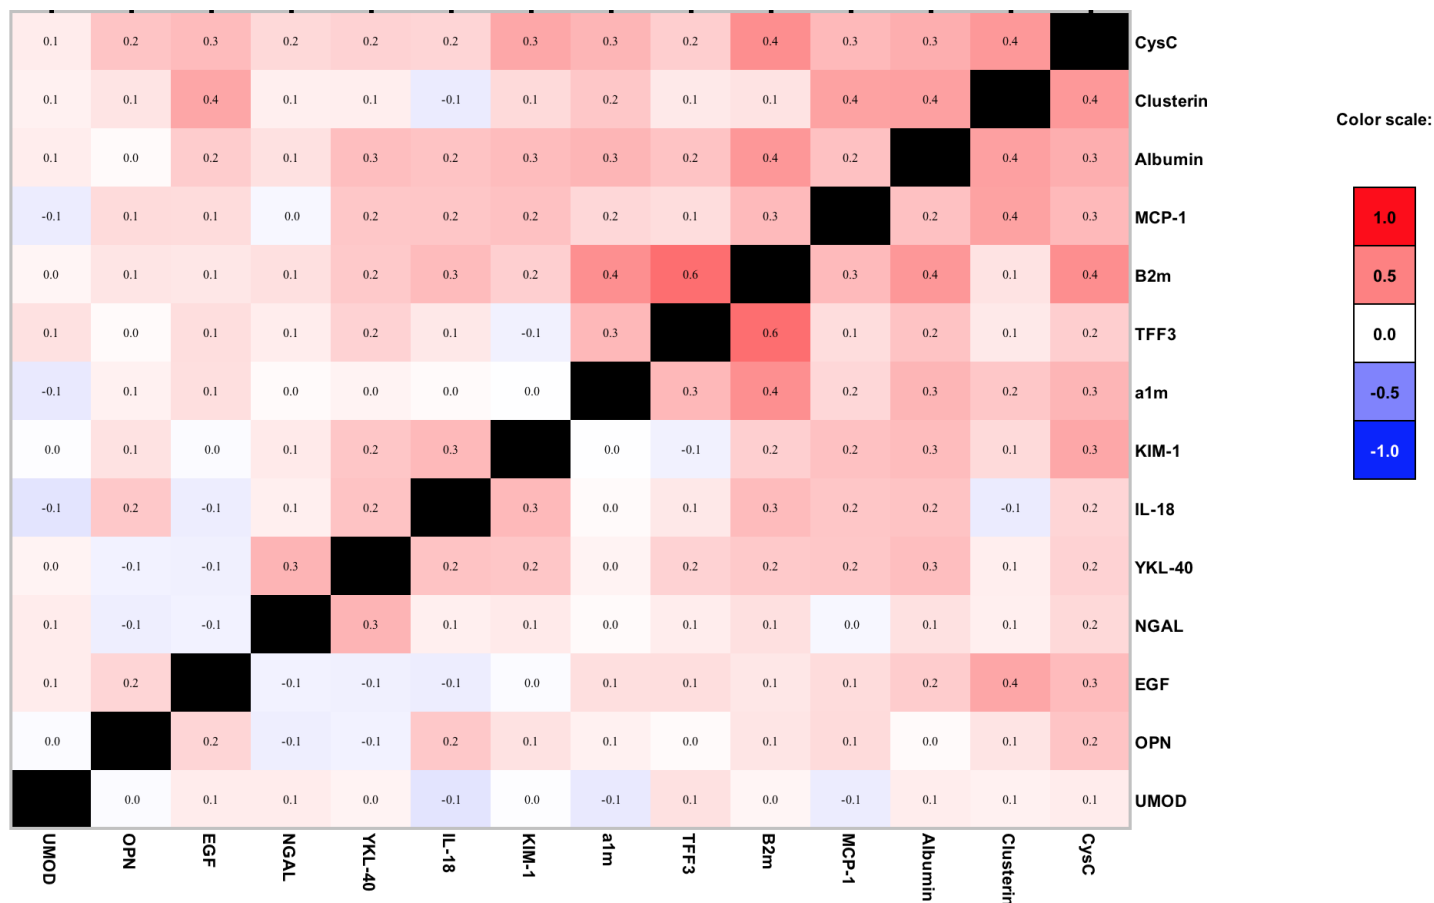

Spearman correlations are displayed as a heat map for ease of interpretation. Positive correlations are depicted in red, and negative correlations are depicted in blue. Full names for each biomarker are as follows: trefoil factor 3 (TFF3),  $\alpha$ 1-microglobulin ( $\alpha$ 1m), clusterin, uromodulin (UMOD), kidney injury molecule-1 (KIM-1),  $\beta$ 2-microglobulin ( $\beta$ 2M), albumin-creatinine ratio (ACR), neutrophil gelatinase-associated lipocalin (NGAL), anti-chitinase-3-like protein 1 (YKL-40), monocyte chemoattractant protein-1 (MCP-1), cystatin C (CysC), osteoponin (OPN), epidermal growth factor (EGF), and interleukin-18 (IL-18).
